# Supplementary material for: C‐terminal Cysteines of CueR Act as Auxiliary Metal Site Ligands upon HgII Binding—A Mechanism To Prevent Transcriptional Activation by Divalent Metal Ions?
Source: PubMed Central journal article supplement (PMC6899792; doi:10.1002/chem.201902940), 2019-10-15
Supplement: CHEM-25-15030-s001.pdf [file CHEM-25-15030-s001.pdf]

# CHEMISTRY

## A **European** Journal

### Supporting Information

#### **C-terminal Cysteines of CueR Act as Auxiliary Metal Site Ligands upon Hg<sup>II</sup> Binding—A Mechanism To Prevent Transcriptional Activation by Divalent Metal Ions?**

Ria K. Balogh,<sup>[a]</sup> Béla Gyurcsik,<sup>[a]</sup> Éva Hunyadi-Gulyás,<sup>[b]</sup> Juliana Schell,<sup>[c]</sup> Peter W. Thulstrup,<sup>[d]</sup> Lars Hemmingsen,<sup>\*,[d]</sup> and Attila Jancsó<sup>\*,[a]</sup>

chem\_201902940\_sm\_miscellaneous\_information.pdf

## Table of contents

|                                                                                                                                                                                                                                                                                                                                                                                                                          |    |
|--------------------------------------------------------------------------------------------------------------------------------------------------------------------------------------------------------------------------------------------------------------------------------------------------------------------------------------------------------------------------------------------------------------------------|----|
| Protein and DNA sequences _____                                                                                                                                                                                                                                                                                                                                                                                          | 2  |
| Cloning, purification and identification of proteins _____                                                                                                                                                                                                                                                                                                                                                               | 2  |
| Mass spectrometry _____                                                                                                                                                                                                                                                                                                                                                                                                  | 3  |
| UV absorption spectroscopy _____                                                                                                                                                                                                                                                                                                                                                                                         | 3  |
| <sup>199</sup> Hg perturbed angular correlation spectroscopy _____                                                                                                                                                                                                                                                                                                                                                       | 3  |
| Quality control of the CueR proteins _____                                                                                                                                                                                                                                                                                                                                                                               | 4  |
| <sup>199</sup> Hg PAC measurements with WT CueR in the presence of DNA _____                                                                                                                                                                                                                                                                                                                                             | 5  |
| Model for the binding of Hg <sup>II</sup> to the functional and C-terminal binding sites _____                                                                                                                                                                                                                                                                                                                           | 5  |
| Figures _____                                                                                                                                                                                                                                                                                                                                                                                                            | 7  |
| Figure S1: SDS-PAGE analysis of the purified ΔC7-CueR protein. _____                                                                                                                                                                                                                                                                                                                                                     | 7  |
| Figure S2: Measured (A) and deconvoluted monoisotopic mass spectra (B) of the purified ΔC7-CueR protein. _____                                                                                                                                                                                                                                                                                                           | 7  |
| Figure S3: (A) CD spectra of the Wild-type and ΔC7-CueR proteins ( <i>c</i> <sub>protein</sub> = 25 μM) (B) EMSA analysis of ΔC7-CueR and 35 bp specific and non-specific DNA fragments. Lane 1 and 6 contain the 100 bp DNA ladder (GeneRuler, Thermo) for comparison. The protein-free specific and non-specific DNA samples are in lanes 2 and 4 respectively, while protein-DNA mixtures are in lanes 3 and 6. _____ | 8  |
| Figure S4: Comparison of the experimental and calculated isotopic envelop of WT CueR, Hg-WT CueR and Hg <sub>2</sub> -WT CueR species (calculations were executed with Protein Prospector ver. 5.22.1 – UCSF). _____                                                                                                                                                                                                     | 9  |
| Figure S5: Comparison of the experimental and calculated isotopic envelop of ΔC7-CueR and Hg-ΔC7-CueR species (calculations were executed with Protein Prospector ver. 5.22.1 – UCSF). _____                                                                                                                                                                                                                             | 10 |
| Figure S6: Experimental and fitted <sup>199</sup> Hg PAC spectra of the WT CueR in the absence of DNA at pH = 8.0 with 0.2, 1.0 and 2.0 equivalents of Hg <sup>II</sup> . <i>c</i> <sub>WT CueR</sub> = 11.5 μM. _____                                                                                                                                                                                                   | 11 |
| Tables _____                                                                                                                                                                                                                                                                                                                                                                                                             | 12 |
| References _____                                                                                                                                                                                                                                                                                                                                                                                                         | 13 |

## Protein and DNA sequences

Wild-type (WT) CueR:

MNISDVAKITGLTSKAIRFYEEKGLVTPPMRSENGYRTYTQQHLNELTLLRQARQVG  
FNLEESGELVNLFNDPQRHSADVKKRRTLEKVAEIERHIEELQSMRDQLLALANACPG  
DDSADCPHIENLSGCCHHRAG

ΔC7-CueR:

MNISDVAKITGLTSKAIRFYEEKGLVTPPMRSENGYRTYTQQHLNELTLLRQARQVG  
FNLEESGELVNLFNDPQRHSADVKKRRTLEKVAEIERHIEELQSMRDQLLALANACPG  
DDSADCPHIENLSG - - - - -

*PcopA* dsDNA: specific double strand DNA fragment including the recognition site of CueR protein *i.e.*, the promoter sequence of *copA* gene:

5' – AAAGGTAAACCTTCCAGCAAGGGGAAGGTCAAGA - 3'

## Cloning, purification and identification of proteins

The gene of *E. coli* CueR was kindly provided by prof. Alfonso Mondragon (Department of Molecular Biosciences, Northwestern University, Evanston, Illinois, USA).<sup>[1]</sup> Initially, the gene of CueR was recloned into pET-21a DNA vector (Novagen) as described previously.<sup>[2]</sup> The gene of C-terminally truncated CueR protein was constructed using a conventional restriction enzyme digestion/ligation cloning method. As a first step, the shortened gene was amplified from pET-21a-CueR plasmid with 5'-TAATACGACTCACTATAGGG-3' forward and 5'-TCGGATCCTCAGCCGGAGAGATTTTC-3' reverse primers in PCR (the underlined nucleotides in the reverse primer denote the BamHI recognition site, while the inverse of the bold triplet is the stop codon). The obtained DNA fragment was digested by NdeI and BamHI (Thermo Scientific) restriction enzymes and ligated by T7 Ligase (NEB) into the pET-21a plasmid digested with the same enzymes. *E. coli* Mach1 (Invitrogen) competent cells were transformed with the resulted plasmid for DNA multiplication. The new construct was sequenced to confirm the success of cloning.

The expression and purification procedures of the mutant CueR protein were performed as described previously for the Wild-type protein,<sup>[2]</sup> except that the second anion exchange step was eliminated. Protein samples were analysed by Tricine-SDS-PAGE<sup>[3]</sup> with Coomassie staining. The purified CueR variant was analysed by mass spectrometry. The intact molecular mass was measured from an acidified and desalted sample. The DNA binding capability was investigated with electrophoretic mobility shift assay. Both procedures were performed similarly like previously.<sup>[2]</sup>

## Mass spectrometry

Mass spectrometric experiments were performed on an LTQ-Orbitrap Elite (Thermo Scientific) mass spectrometer coupled with a TriVersa NanoMate (Advion) chip-based electrospray ion source. The capillary voltage was 1.3 – 1.4 keV and the source temperature was 300 °C. We used Xcalibur 2.2 (Thermo) software for data evaluation and deconvolution.

Native mass spectra were measured from samples containing Wild-type or truncated CueR at a protein concentration of 20  $\mu\text{M}$  (10 mM ammonium bicarbonate/ $\text{NH}_3$ , 0.5 mM TCEP, pH 7.5). 0.2, 0.5, 1.0 and 2.0 equivalents of  $\text{Hg}^{\text{II}}$  was added to individual samples from a  $\text{HgCl}_2$  stock solution ( $c_{\text{Hg}^{\text{II}}}$  = 250  $\mu\text{M}$ ).

## UV absorption spectroscopy

UV absorbance spectra were recorded with a Shimadzu UV2600/UV3600 spectrophotometer in a wavelength range of 200-390 nm with 1 nm steps. The titration was carried out in a Hellma semi-micro quartz cell with 10 mm optical path length supplemented with magnetic stirrer and Teflon stopper. Initial concentration of the WT and  $\Delta\text{C7}$ -CueR were 14 and 12  $\mu\text{M}$ , respectively. Samples were buffered with Tris (20 mM Tris/ $\text{HClO}_4$ , 0.3 mM TCEP, pH 7.5). 7.0 or 6.0  $\mu\text{L}$  aliquots (corresponding to 0.1 eq.  $\text{Hg}^{\text{II}}$  per CueR monomer) of a  $\text{HgCl}_2$  stock solution ( $c_{\text{Hg}^{\text{II}}}$  =  $2.4 \times 10^{-4}$  M) was added to the protein samples. From all the recorded spectra the spectrum of Tris buffer was subtracted as a baseline. The difference spectra were obtained by subtracting the spectra of apo-protein ( $\Delta A = A_{\text{Hg-protein}} - A_{\text{apo-protein}}$ ) and the offset of the baseline (*i.e.* the absorbance measured at 390 nm).

## Circular dichroism spectroscopy

Circular dichroism spectra were recorded on a Jasco J-815 spectropolarimeter. All spectra were recorded with 1 nm steps and a dwell time of 2 s per step, using a 0.2 mm quartz cell (SUPRASIL, Hellma GmbH, Germany), in the wavelength range of 180-260 nm. Protein concentration was 25  $\mu\text{M}$ .

## $^{199\text{m}}\text{Hg}$ perturbed angular correlation spectroscopy

$^{199\text{m}}\text{Hg}$  PAC measurements were performed at ISOLDE beam line at CERN. Radioactive mercury was generated by irradiating a liquid Pb target with protons (1 GeV).  $^{199\text{m}}\text{Hg}$  isotopes were selected with an on-line mass separator, and the ion beam was collected into ca. 150  $\mu\text{L}$  ice kept in a Teflon holder cooled by a cold finger.

The radioactive  $^{199\text{m}}\text{Hg}$  solution was mixed with non-radioactive  $\text{HgCl}_2$  solution in Tris/ $\text{HClO}_4$  buffer (pH = 7.5), followed by the addition of the Wild-type or truncated CueR protein (in 20 mM Tris/ $\text{HClO}_4$ , 1 mM TCEP, pH 7.5). As the next step *PcopA* dsDNA (in 20 mM Tris/ $\text{HClO}_4$ , 0.1 mM  $\text{NaClO}_4$ , pH 8.0) was added. The pH was adjusted to 7.46 (at 25 °C) or 5.73 (at 25 °C) by adding Tris or MES buffers and solutions of NaOH or  $\text{HClO}_4$ . Finally, sucrose (55 % *w/w*) was added to the mixtures and dissolved. The data were recorded on a 6-detector ( $\text{BaF}_2$ ) instrument at 1 °C. The pH values of samples were verified after the measurements and the decay of radioactive mercury.

The fitting was carried out using 300 data points (except the first 10 due to systematic errors in these), using a Lorentzian line shape for the static line broadening. The background subtraction in each of the coincidence groups was estimated using channels 550-600 (i.e.  $\sim 12$  lifetimes of the intermediate nuclear level after  $t_0$ ).  $t_0$  for each group was determined using data from an experiment at the beginning of the beam time and at the end of the beam time, and gave values which were all the same within one channel (0.05 ns). Fourier transformation of the data and fits were carried out using 300 data points and a Keiser-Bessel window with the window parameter equal to 4. The time resolution and the time per channel were 0.52 ns and 0.05019 ns, respectively. Certain coincidence groups in the spectra of WT CueR (11, 17, and 23; all of which have detector 5 providing the stop pulse) exhibited systematic deviation (different from that originating from NQIs, and visible as a “bump”  $\sim 100$  channels after  $t_0$ ) from the exponential decay of the intermediate nuclear level, and these groups were not included in data analysis.

### Quality control of the CueR proteins

The seven amino acid long C-terminal segment (starting from G128) was deleted in the truncated variant of CueR, hereafter denoted  $\Delta\text{C7}$ -CueR. This mutant mimics the coordination properties of the metal ion binding loop of CueR displaying the residues C112 and C120 thus, comparison of the metal ion binding features of this protein with the Wild-type CueR may help to reveal a possible function of the CCHH motif. The integrity of the purified  $\Delta\text{C7}$ -CueR was analysed by SDS-PAGE (Figure S1), and mass spectrometry (Figure S2). The deconvoluted mass spectrum indicated a 14462.29 Da monoisotopic molecular mass for the singly charged intact protein ( $\text{MH}^+$ ) which corresponds well to the calculated value (14462.31 Da). The similarity of the circular dichroism spectra of the truncated and WT CueR (Figure S3A) suggested that the modification did not change significantly the secondary structure of the

protein. Moreover, electrophoretic mobility shift assay (EMSA) revealed that the DNA binding specificity of the truncated protein was maintained (Figure S3B).

### **$^{199}\text{mHg}$ PAC measurements with WT CueR in the presence of DNA**

At pH 8.0 and in the absence of DNA, the picture is qualitatively similar to that observed in the presence of DNA (Figure S7). Clearly, there are no major differences induced by the binding of DNA, and accordingly, the coordination number of  $\text{Hg}^{\text{II}}$  does not change. Consequently, the spectrum recorded with 0.2 equivalent  $\text{Hg}^{\text{II}}$  without DNA at pH 8 may be interpreted in terms of structures as indicated in the main text, *i.e.* an equilibrium between  $\text{HgS}_2$  and T-shaped  $\text{HgS}_3$  coordination geometries. It is possible that the equilibrium between the two species observed at 0.2 equivalent  $\text{Hg}^{\text{II}}$  is shifted slightly towards the low frequency component, which presumably reflects the  $\text{HgS}_3$  structure, but the accuracy of the fitted amplitudes is not adequate to make an indisputable conclusion on this issue. The spectra recorded with 1.0 equivalent  $\text{Hg}^{\text{II}}$  with and without DNA present are highly similar, exhibit subtle differences, mainly a slightly higher frequency and lower asymmetry parameter in the presence of DNA. This appears to be significant, as the two first peaks are more separated in the presence of DNA than in the absence of DNA. This might be due to a purer linear  $\text{HgS}_2$  coordination geometry in the presence of DNA, possibly reflecting that the coordinating donor groups in the equatorial plane are farther away from  $\text{Hg}^{\text{II}}$ .

### **Model for the binding of $\text{Hg}^{\text{II}}$ to the functional and C-terminal binding sites**

For each protein dimer there are 4 metal binding sites, and they come in pairs: M1 and M2 at one end, and M1' and M2' at the other end. It is reasonable to assume that if both M1 and M2 are occupied by  $\text{Hg}^{\text{II}}$  both will be  $\text{HgS}_2$ , and there will be no  $\text{HgS}_3$  coordination geometries. In addition, the affinity of the protein for  $\text{Hg}^{\text{II}}$  is so high that free  $\text{Hg}^{\text{II}}$  may be neglected.

Make the following assumptions:

- 1)  $\text{Hg}^{\text{II}}$  is randomly distributed among the metal sites, *i.e.* they are independent sites
- 2) If only M1 or M2 is occupied  $\text{HgS}_3$  may be formed, because the free thiols of the adjacent site are available for coordination. The equilibrium between  $\text{HgS}_2$  and  $\text{HgS}_3$  may be estimated from the relative population derived from the amplitudes of the two

species in the  $^{199\text{m}}\text{Hg}$  PAC data with 0.2 eq.  $\text{Hg}^{\text{II}}$  at pH 8, in the absence of DNA,  $[\text{HgS}_2]/[\text{HgS}_3] = 1.5 \pm 1.1$ , see Table S1.

With these assumptions, we can compare the  $^{199\text{m}}\text{Hg}$  PAC data with the UV absorption spectra at any  $\text{Hg}^{\text{II}}/\text{CueR}$  ratio, as exemplified in the following for the experiment performed with 1.0 eq.  $\text{Hg}^{\text{II}}$  per protein.

With 1.0 eq.  $\text{Hg}^{\text{II}}$  the probability of M1 being occupied is 0.5 (and correspondingly the probability of being vacant is 0.5). Thus, the probability of M1 and M2 being occupied at the same time is  $0.5 \times 0.5$ , and thus the probability of  $\text{HgS}_2$  due to both sites being occupied is 0.25 (since there are two sites it is multiplied by 2 in the following). The probability of M1 being occupied and M2 not being occupied is  $0.5 \times 0.5$ , and vice versa (M2 occupied and M1 not being occupied is also  $0.5 \times 0.5$ ), in total  $2 \times 0.5 \times 0.5 = 0.5$ . In this case we know  $[\text{HgS}_2]/[\text{HgS}_3] = 1.5 \pm 1.1$ , so out of this 0.5, 0.3 gives  $\text{HgS}_2$  and 0.2 gives  $\text{HgS}_3$ . Thus in total  $\text{HgS}_2/\text{HgS}_3 = (2 \times 0.25 + 0.3)/0.2 = 4$  (in fact, given the standard deviation of 1.1,  $\text{HgS}_2/\text{HgS}_3$  is predicted to be within the range from 1.8-5.5 at 1 eq.  $\text{Hg}^{\text{II}}$  per protein) in agreement with the UV data giving  $\text{HgS}_2/\text{HgS}_3 \sim 2.5$ , using the data in Figure 4A and 4C.

## Figures

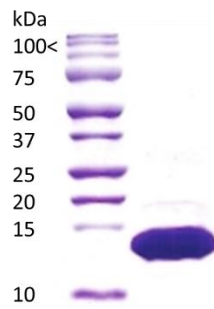

Figure S1: SDS-PAGE analysis of the purified  $\Delta C7$ -CueR protein.

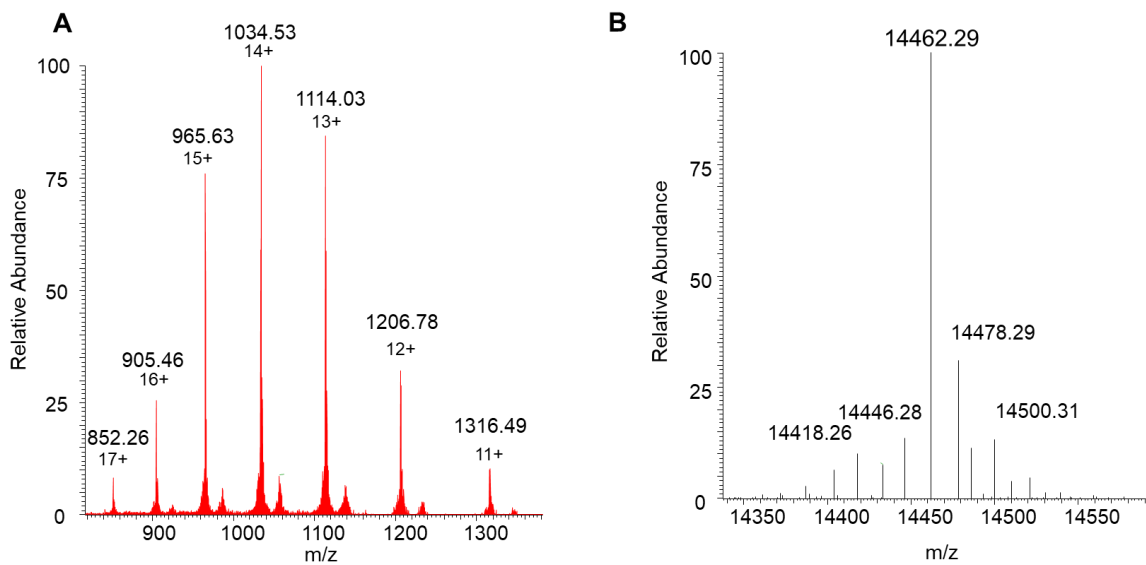

Figure S2: Measured (A) and deconvoluted monoisotopic mass spectra (B) of the purified  $\Delta C7$ -CueR protein.



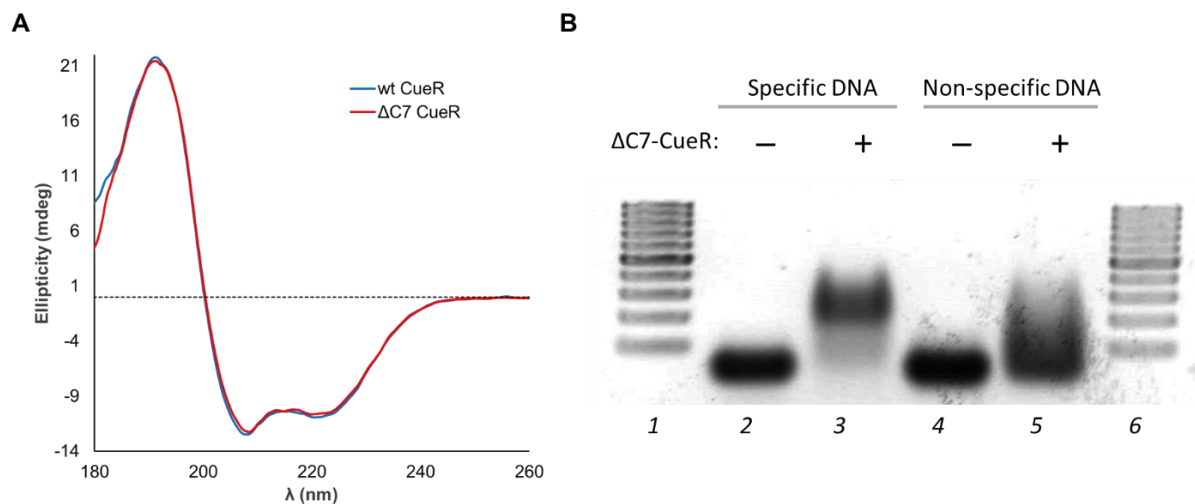

Figure S3: (A) CD spectra of the Wild-type and  $\Delta$ C7-CueR proteins ( $c_{\text{protein}} = 25 \mu\text{M}$ ) (B) EMSA analysis of  $\Delta$ C7-CueR and 35 bp specific and non-specific DNA fragments. Lane 1 and 6 contain the 100 bp DNA ladder (GeneRuler, Thermo) for comparison. The protein-free specific and non-specific DNA samples are in lanes 2 and 4 respectively, while protein-DNA mixtures are in lanes 3 and 5.

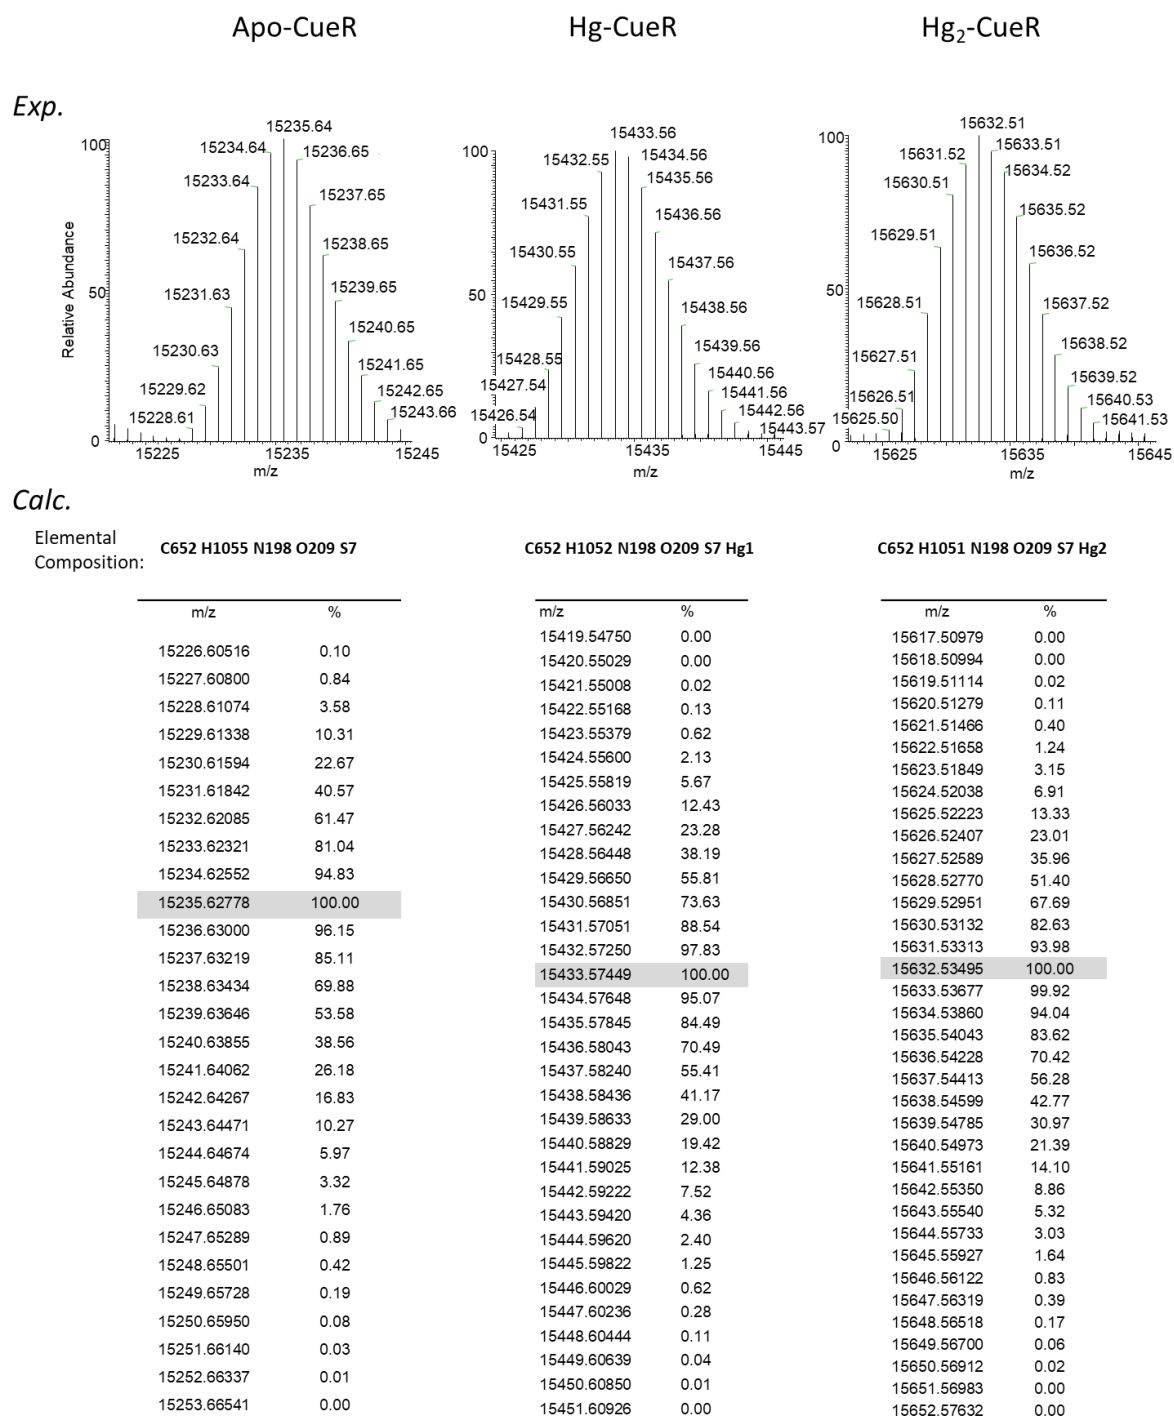

Figure S4: Comparison of the experimental and calculated isotopic envelop of WT CueR, Hg-WT CueR and Hg<sub>2</sub>-WT CueR species (calculations were executed with Protein Prospector ver. 5.22.1 – UCSF).

Apo- $\Delta$ C7CueR

Hg- $\Delta$ C7CueR

Exp.

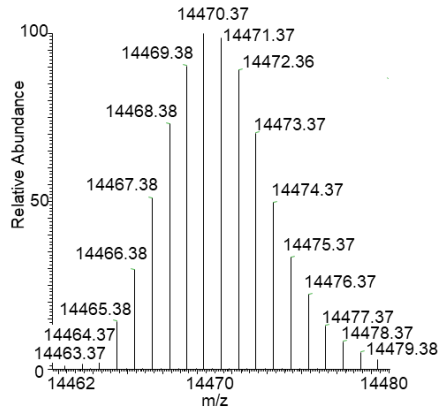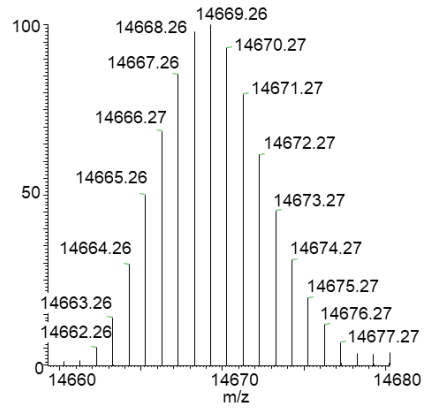

Calc.

Elemental  
Composition:

C623 H1011 N184 O202 S5

C623 H1009 N184 O202 S5 Hg1

| m/z         | %      |
|-------------|--------|
| 14462.30928 | 0.16   |
| 14463.31214 | 1.29   |
| 14464.31491 | 5.20   |
| 14465.31760 | 14.23  |
| 14466.32023 | 29.70  |
| 14467.32279 | 50.39  |
| 14468.32529 | 72.34  |
| 14469.32774 | 90.30  |
| 14470.33015 | 100.00 |
| 14471.33251 | 99.74  |
| 14472.33484 | 90.67  |
| 14473.33714 | 75.83  |
| 14474.33941 | 58.82  |
| 14475.34165 | 42.58  |
| 14476.34387 | 28.93  |
| 14477.34607 | 18.53  |
| 14478.34826 | 11.23  |
| 14479.35044 | 6.46   |
| 14480.35261 | 3.54   |
| 14481.35481 | 1.85   |
| 14482.35702 | 0.92   |
| 14483.35928 | 0.43   |
| 14484.36164 | 0.19   |
| 14485.36411 | 0.08   |
| 14486.36650 | 0.03   |
| 14487.36930 | 0.01   |
| 14488.37067 | 0.00   |

| m/z         | %      |
|-------------|--------|
| 14656.25945 | 0.00   |
| 14657.26224 | 0.00   |
| 14658.26194 | 0.03   |
| 14659.26358 | 0.20   |
| 14660.26573 | 0.91   |
| 14661.26797 | 3.00   |
| 14662.27019 | 7.69   |
| 14663.27236 | 16.22  |
| 14664.27448 | 29.22  |
| 14665.27658 | 46.06  |
| 14666.27865 | 64.67  |
| 14667.28072 | 81.90  |
| 14668.28279 | 94.46  |
| 14669.28485 | 100.00 |
| 14670.28692 | 97.82  |
| 14671.28900 | 88.91  |
| 14672.29107 | 75.45  |
| 14673.29315 | 60.04  |
| 14674.29522 | 44.98  |
| 14675.29730 | 31.81  |
| 14676.29938 | 21.32  |
| 14677.30147 | 13.56  |
| 14678.30356 | 8.20   |
| 14679.30566 | 4.72   |
| 14680.30779 | 2.58   |
| 14681.30991 | 1.34   |
| 14682.31208 | 0.66   |
| 14683.31434 | 0.30   |
| 14684.31650 | 0.12   |
| 14685.31885 | 0.04   |
| 14686.32123 | 0.01   |
| 14687.32309 | 0.00   |

Figure S5: Comparison of the experimental and calculated isotopic envelop of  $\Delta$ C7-CueR and Hg- $\Delta$ C7-CueR species (calculations were executed with Protein Prospector ver. 5.22.1 – UCSF).

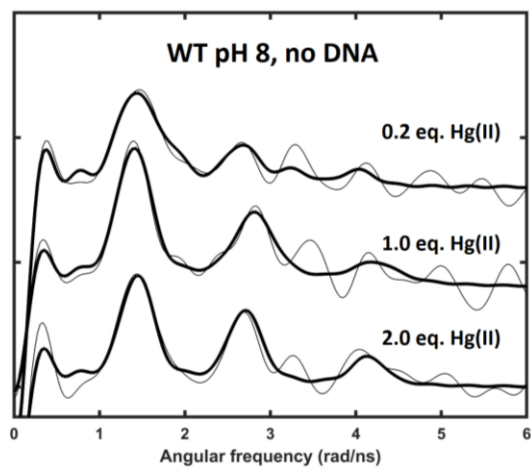

Figure S6: Experimental (grey) and fitted (black)  $^{199\text{m}}\text{Hg}$  PAC spectra of the WT CueR in the absence of DNA at pH = 8.0 with 0.2, 1.0 and 2.0 equivalents of  $\text{Hg}^{\text{II}}$ .  $c_{\text{WT CueR}} = 11.5 \mu\text{M}$ .

## Tables

**Table S1** Parameters fitted to the  $^{199\text{m}}\text{Hg}$  PAC-data for the WT CueR, see Hemmingsen et al. 2004<sup>[4]</sup> for a description of the parameters. The numbers in parenthesis are the standard deviations of the fitted parameters a: Can be analysed with only one NQI, but then the fit gives either too low amplitude (high eta, and the fact that the third peak appears to rise above the noise indicates that the high eta NQI alone is not adequate to achieve a good fit) or too high amplitude (low eta). b: faster reorientation may reflect less rigid geometry at site 2. c: It is conceivable that this relatively high value (as compared to the other datasets) may reflect the presence of another NQI (as observed with 0.2 eq.  $\text{Hg}^{\text{II}}$ ), and indeed the fit is not as satisfactory, but the reduced chi-square is not statistically significantly improved by including a second NQI, and therefore, only one NQI is used to fit the data. d: Fast reorientation may reflect exchange between the two species. e: The presence of DNA bound to CueR does not give rise to a measurable change in  $1/\tau_c$ .

| $\text{Hg}^{\text{II}} : \text{WT}$<br>CueR | $C_{\text{protein,final}}$ | $C_{\text{Hg}^{\text{II}},\text{final}}$ | $C_{\text{DNA,final}}$ | pH  | $\nu_Q$            | $\eta$               | $\delta$     | $1/\tau_c$         | $A$          | $\chi^2$ |
|---------------------------------------------|----------------------------|------------------------------------------|------------------------|-----|--------------------|----------------------|--------------|--------------------|--------------|----------|
|                                             | ( $\mu\text{M}$ )          | ( $\mu\text{M}$ )                        | ( $\mu\text{M}$ )      |     | (GHz)              |                      | $\times 100$ | $\mu\text{s}^{-1}$ | $\times 100$ |          |
| 0.2                                         | 11.5                       | 2.30                                     | 5.68                   | 6.0 | 1.48(1)            | 0.13(4)              | 0(1)         | 7(3)               | 13(2)        | 0.82     |
| 0.2 <sup>a</sup>                            | 11.5                       | 2.30                                     | 5.68                   | 8.0 | 1.48(1)<br>1.13(2) | 0(1)<br>0.56(8)      | 0(2)<br>0(4) | 16(3) <sup>d</sup> | 9(2)<br>5(1) | 0.78     |
| 1.0                                         | 11.5                       | 11.5                                     | 5.68                   | 6.0 | 1.474(9)           | 0.18(2)              | 0(1)         | 8(2)               | 13(1)        | 0.66     |
| 1.0                                         | 11.5                       | 11.5                                     | 5.68                   | 8.0 | 1.49(2)            | 0.23(4) <sup>c</sup> | 2(2)         | 8(5)               | 12(2)        | 0.71     |
| 2.0                                         | 11.5                       | 23.0                                     | 5.68                   | 6.0 | 1.49(1)            | 0.12(5)              | 0(2)         | 17(4) <sup>b</sup> | 15(1)        | 0.75     |
| 2.0                                         | 11.5                       | 23.0                                     | 5.68                   | 8.0 | 1.53(1)            | 0.15(5)              | 2(2)         | 10(3) <sup>b</sup> | 14(2)        | 0.67     |
| 0.2 <sup>a</sup>                            | 11.5                       | 2.30                                     | 0                      | 8.0 | 1.42(2)<br>1.04(4) | 0.1(1)<br>0.77(9)    | 0(3)<br>0(6) | 11(4) <sup>d</sup> | 6(3)<br>4(2) | 0.71     |
| 1.0                                         | 11.5                       | 11.5                                     | 0                      | 8.0 | 1.49(2)            | 0(1)                 | 5(2)         | 7(2) <sup>e</sup>  | 16(2)        | 0.75     |
| 2.0                                         | 11.5                       | 23.0                                     | 0                      | 8.0 | 1.45(1)            | 0.23(3)              | 1(2)         | 12(4) <sup>b</sup> | 13(2)        | 0.80     |

**Table S2:** Parameters fitted to the  $^{199\text{m}}\text{Hg}$  PAC-data for  $\Delta\text{C7-CueR}$  with the same sample conditions.

| $\text{Hg}^{\text{II}} : \Delta\text{C7-CueR}$ | $C_{\text{protein,final}}$ | $C_{\text{Hg}^{\text{II}},\text{final}}$ | $C_{\text{DNA,final}}$ | pH  | $\nu_{\text{Q}}$ | $\eta$  | $\delta$     | $1/\tau_{\text{c}}$ | $A$          | $\chi_{\text{r}}^2$ |
|------------------------------------------------|----------------------------|------------------------------------------|------------------------|-----|------------------|---------|--------------|---------------------|--------------|---------------------|
|                                                | ( $\mu\text{M}$ )          | ( $\mu\text{M}$ )                        | ( $\mu\text{M}$ )      |     | (GHz)            |         | $\times 100$ | $\text{us}^{-1}$    | $\times 100$ |                     |
| 0.2                                            | 8.45                       | 1.69                                     | 4.23                   | 6.0 | 1.55(2)          | 0.07(9) | 8(2)         | 23(17)              | 15(2)        | 0.62                |
| 0.2                                            | 8.45                       | 1.69                                     | 4.23                   | 8.0 | 1.55(1)          | 0.16(3) | 3(2)         | 120(27)             | 14(1)        | 0.66                |
| 1.0                                            | 8.45                       | 8.45                                     | 4.23                   | 6.0 | 1.55(2)          | 0.13(5) | 6(2)         | 78(26)              | 15(2)        | 0.72                |
| 1.0                                            | 8.45                       | 8.45                                     | 4.23                   | 8.0 | 1.52(2)          | 0.16(5) | 6(2)         | 16(22)              | 12(2)        | 0.75                |
| 2.0                                            | 8.45                       | 16.9                                     | 4.23                   | 8.0 | 1.60(4)          | 0.15(7) | 10(3)        | 97(37)              | 16(2)        | 0.56                |

## References

- [1] F. W. Outten, C. E. Outten, J. Hale, T. V. O'Halloran, *Journal of Biological Chemistry* **2000**, *275*, 31024-31029.
- [2] R. K. Balogh, B. Gyurcsik, É. Hunyadi-Gulyás, H. E. M. Christensen, A. Jancsó, *Protein Expression and Purification* **2016**, *123*, 90-96.
- [3] H. Schägger, *Nature Protocols* **2006**, *1*, 16.
- [4] L. Hemmingsen, K. N. Sas, E. Danielsen, *Chemical Reviews* **2004**, *104*, 4027-4062.
